# Supplementary material for: Rapid synthesis of cesium lead halide perovskite nanocrystals by l-lysine assisted solid-phase reaction at room temperature
Source: Royal Society of Chemistry journal article supplement (doi:10.1039/d0ra07589b), 2020-01-01
Supplement: d0ra07589b1.pdf [file d0ra07589b1.pdf]

## *Supporting Information*

### *For*

# **Rapid Synthesis of Cesium Lead Halide Perovskite Nanocrystals by L-lysine Assisted Solid-Phase Reaction at Room Temperature**

*Yi-Lin Hu, Qiu-Lin Wen, Zheng-Fen Pu, An-Yong Liu, Jun Wang, Jian  
Ling\*, Xiao-Guang Xie, Qiu-E Cao\**

Functional Molecules Analysis and Biotransformation Key Laboratory of  
Universities in Yunnan Province, School of Chemical Science and  
Technology, Yunnan University, Kunming 650091, China

\*Corresponding authors. Email: [lingjian@ynu.edu.cn](mailto:lingjian@ynu.edu.cn) (J. Ling) and  
[qecao@ynu.edu.cn](mailto:qecao@ynu.edu.cn) (Q.E Cao) Tel, +86-871-65033719; Fax, +86-871-  
65033679

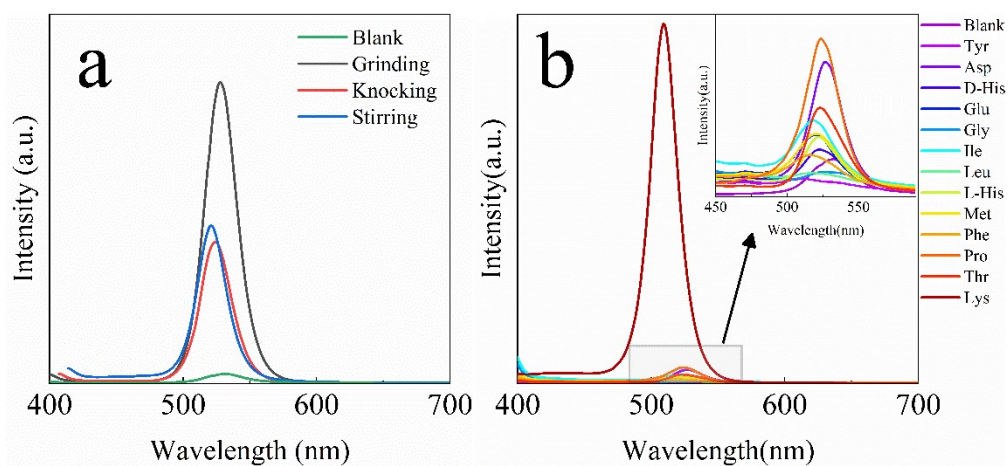

**Figure S1.** a) Photoluminescence spectra of Lys-PNCs obtained by three solid-phase synthesis and blank samples without L-lysine. c) Photoluminescence spectra of various amino acid-assisted synthetic samples (by Stirring) and blank sample.

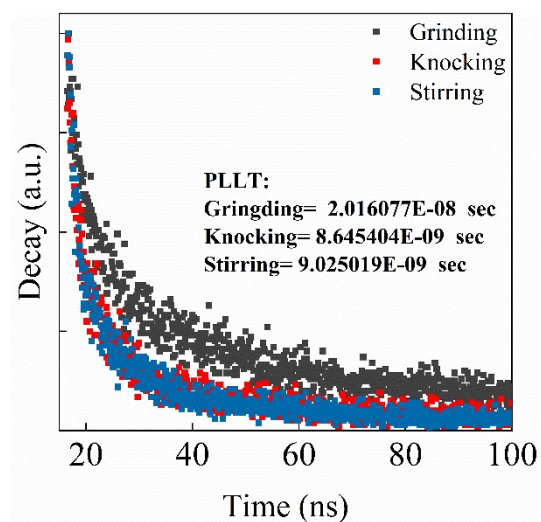

**Figure S2.** Photoluminescence lifetime of samples obtained by three solid phase synthesis methods (Calculated using 2 exponentials).

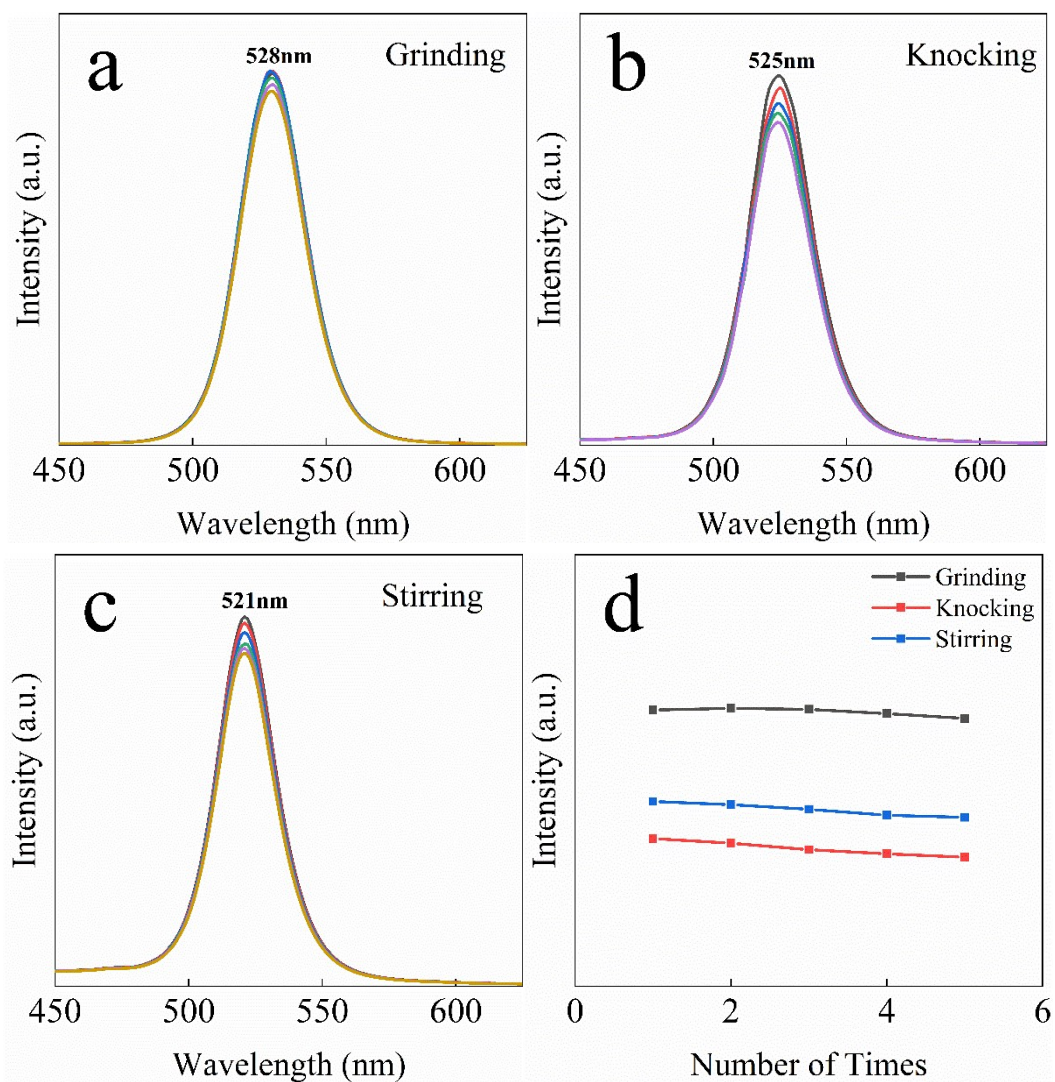

**Figure S3.** The photoluminescence spectra of samples obtained by three solid-phase synthesis methods were scanned five consecutive times under their maximum excitation.

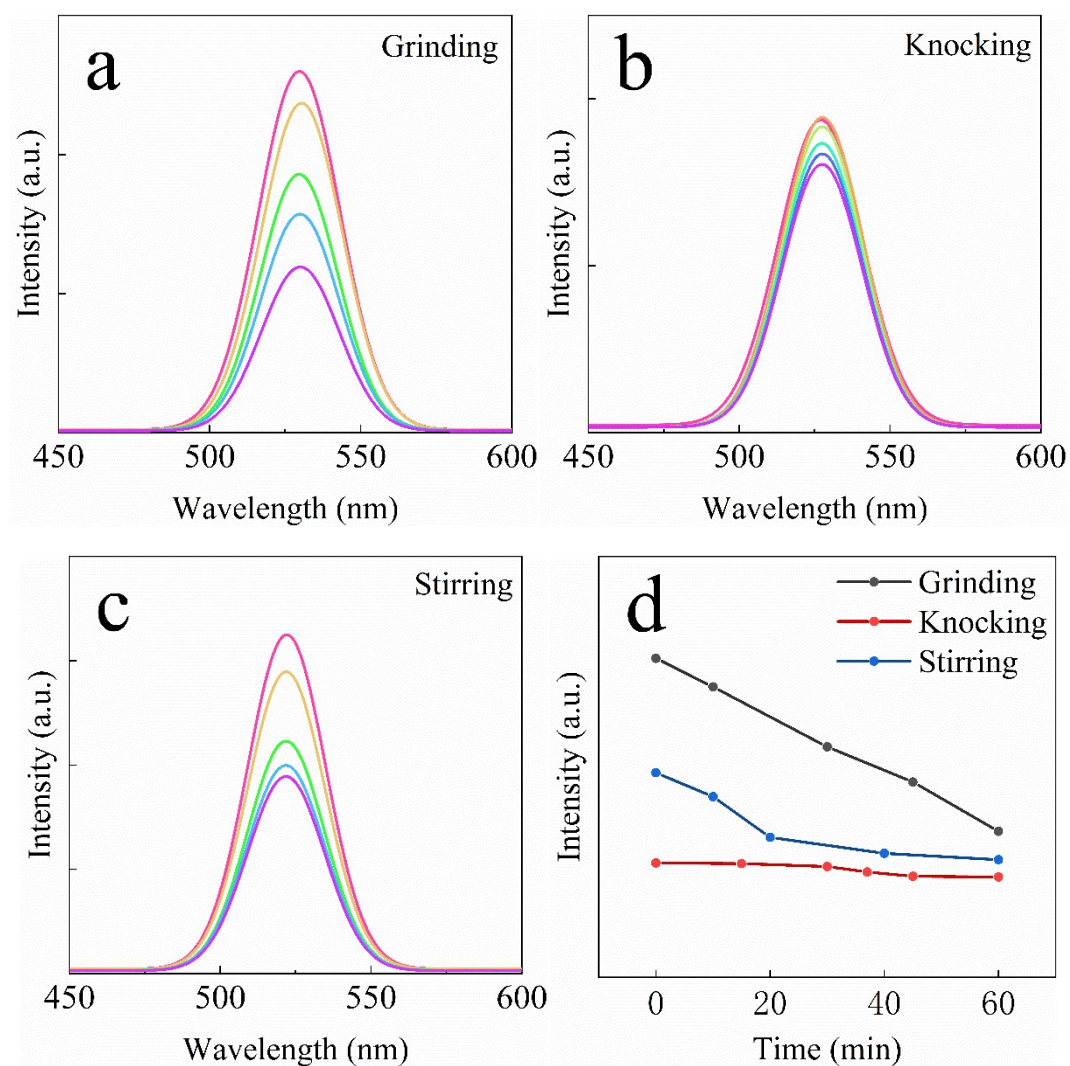

**Figure S4.** The stability of the samples obtained by three solid-phase synthesis methods directly exposed to the air at temperature of 37°C and the humidity of 51%.

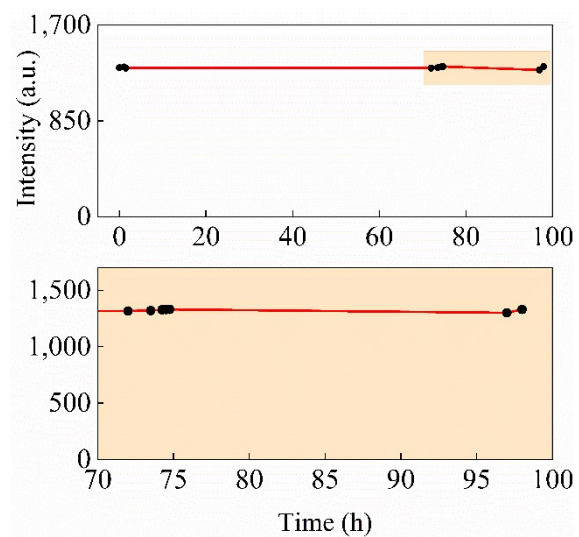

**Figure S5.** The stability of the sample obtained by Stirring when stored in the dark at 4°C.



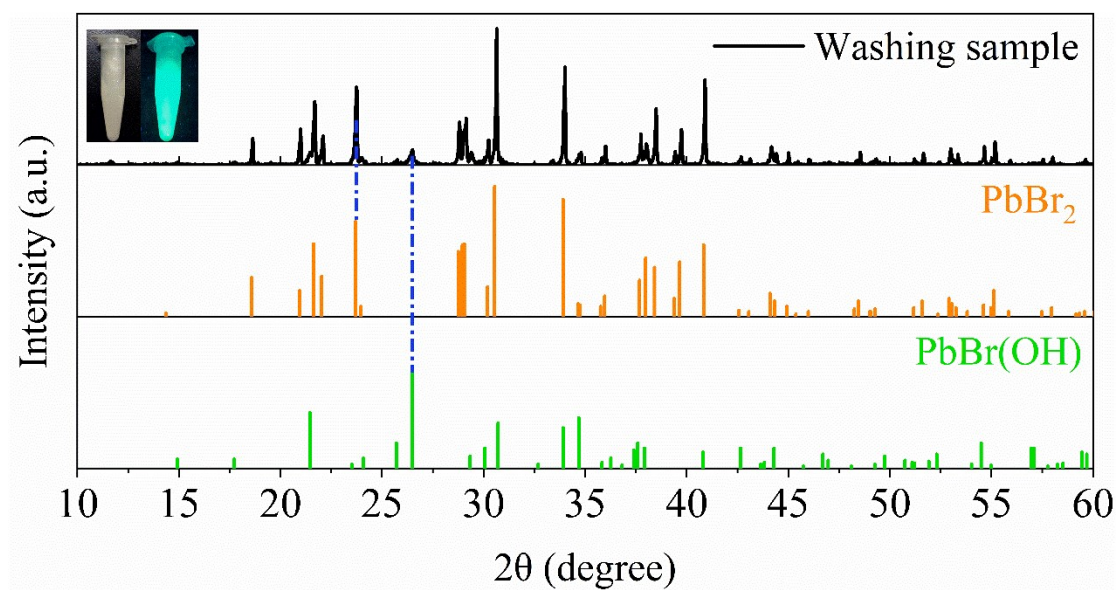

**Figure S6.** XRD of the sample washed three times with UP water. The illustrations are Lys-PNCs in water taken under daylight and 365 nm light.
